# Supplementary material
Source: MDPI journal article supplement (https://www.mdpi.com/2073-4441/14/11/1725)
Supplement: s1 [file s1]

# An integrated approach for investigating the salinity evolution in a Mediterranean coastal karst aquifer

Eleonora Frollini <sup>1</sup>, Daniele Parrone <sup>1,\*</sup>, Stefano Ghergo <sup>1</sup>, Rita Masciale <sup>2</sup>, Giuseppe Passarella <sup>2</sup>, Maddalena Pennisi <sup>3</sup>, Matteo Salvadori <sup>3</sup>, Elisabetta Preziosi <sup>1</sup>

## Supplementary Materials

### Figures

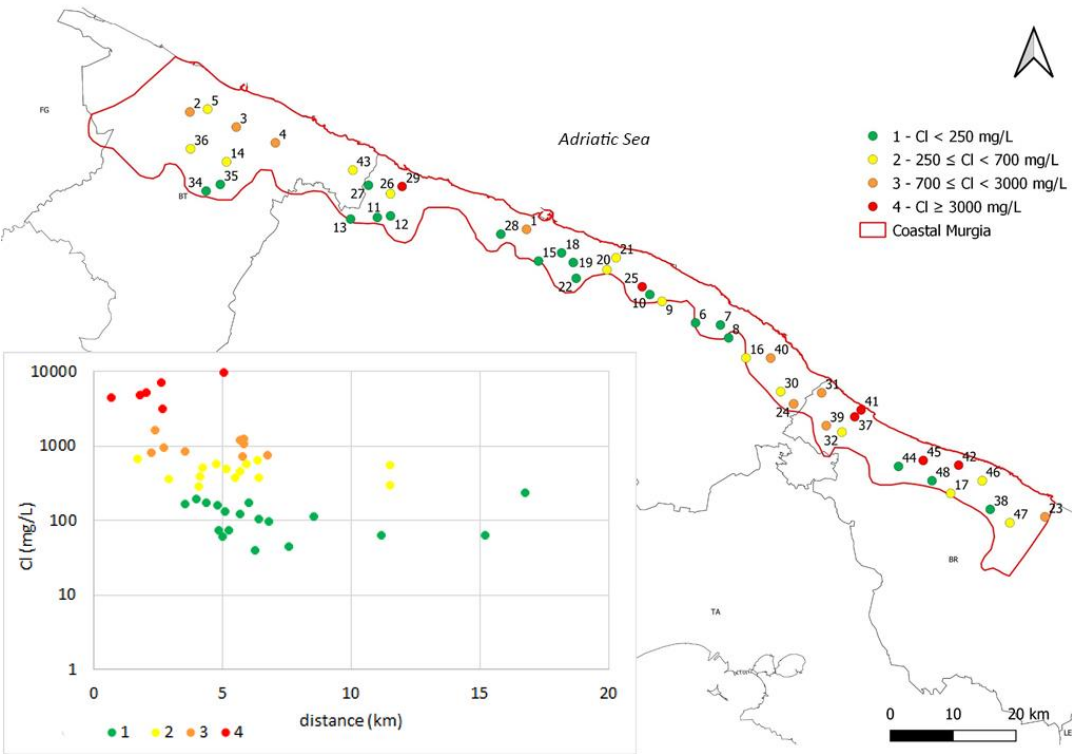

Figure S1. Map of chloride concentrations and chart of chloride concentrations vs distance from coastline.

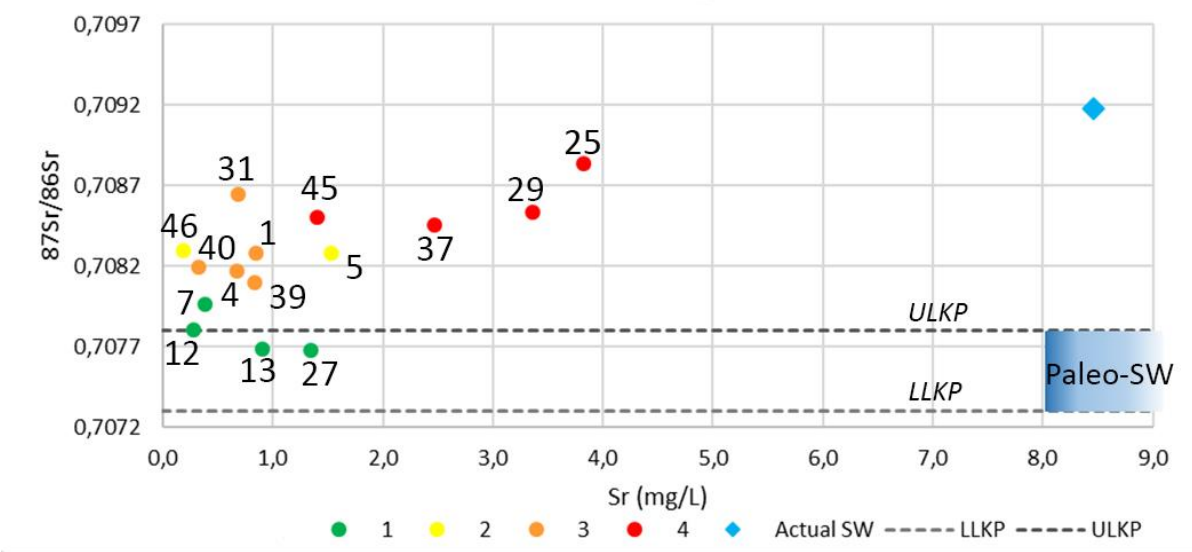

**Figure S2.**  $^{87}\text{Sr}/^{86}\text{Sr}$  ratio vs Sr concentration observed in the MWs of the Coastal Murgia. The meaning of dots colours is the same of the figure S1. The light blue diamond represents the value of the actual seawater. ULKP = upper limit of the Cretaceous platform, LLKP = lower limit of the Cretaceous platform. Blue rectangle represents the range of paleo-seawater

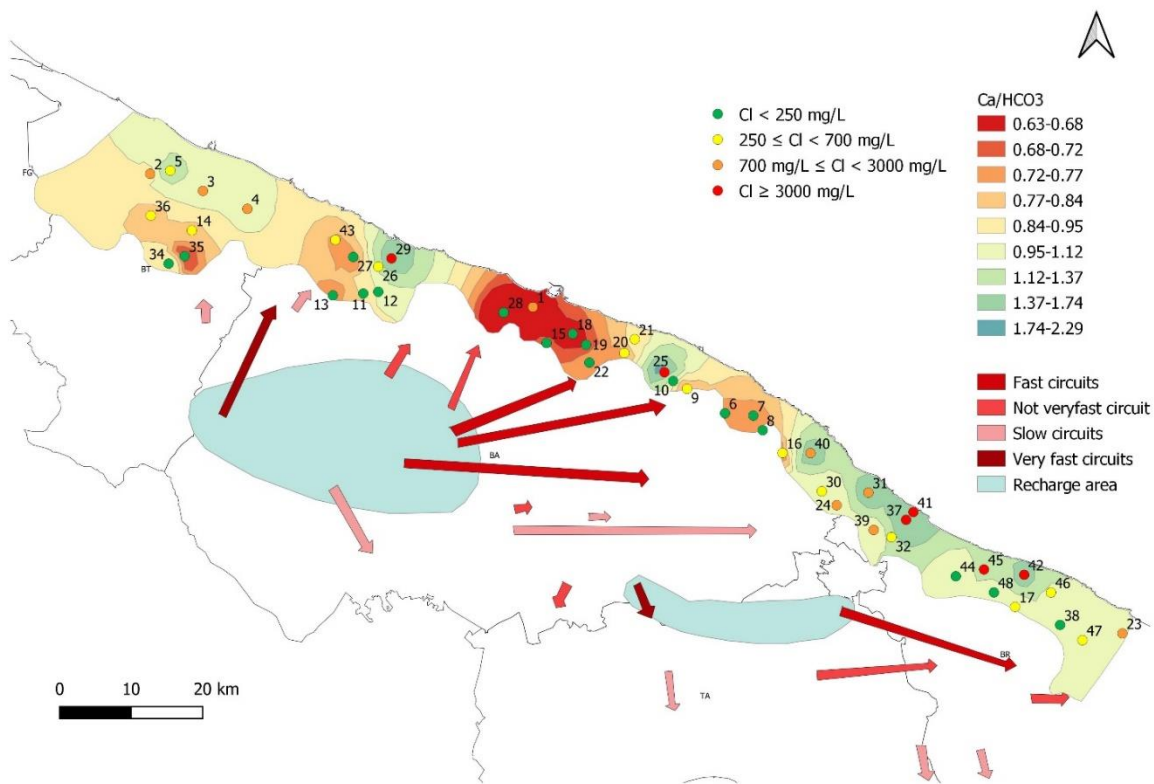

**Figure S3.** Map of chloride concentration at the monitoring wells and the spatial interpolation of Ca/HCO<sub>3</sub> ratio (Inverse Distance Squared Weighted method). Arrows and recharge areas overlap the circuits and recharge area described by Tulipano et al. [41]

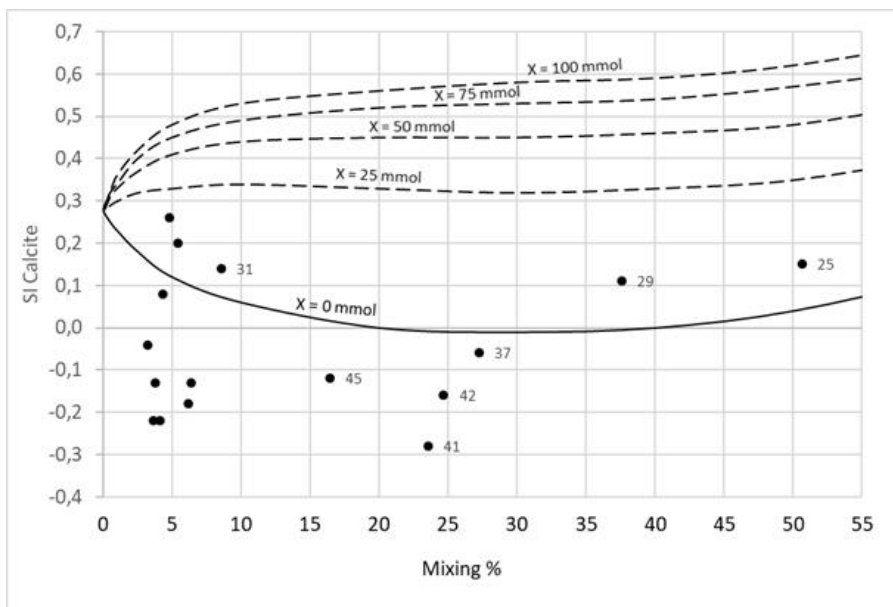

**Figure S4.** Simulated calcite Saturation Indexes (SI). Comparison between pure mixing (continuous line) and coupled model mixing+ion exchange (dashed lines) at different exchanger concentrations. Black dots indicate the calcite SI for the sampled waters (mixing > 3%)

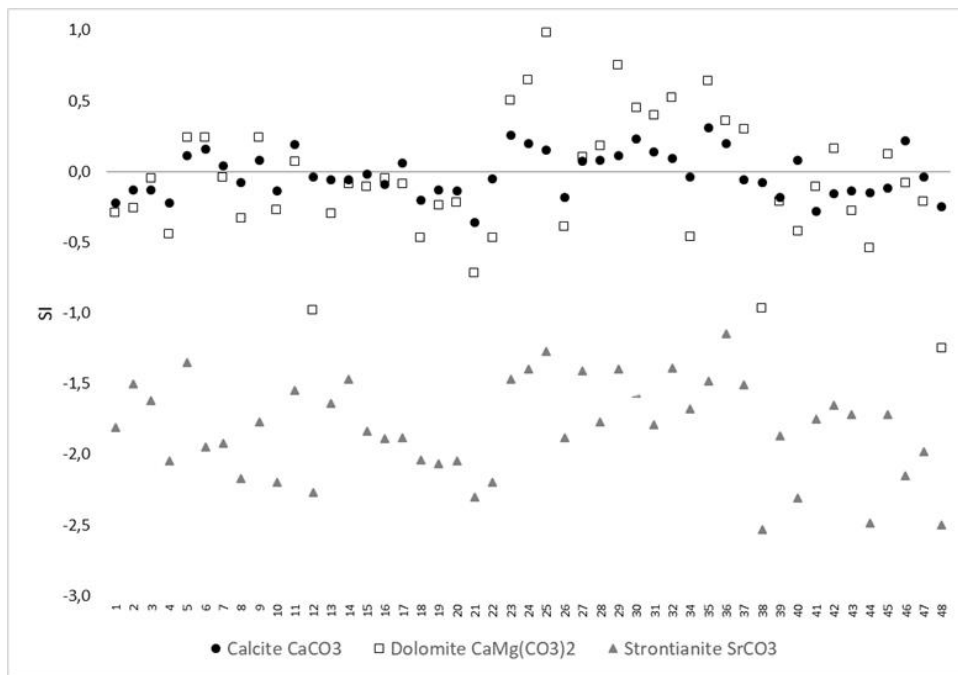

**Figure S5.** Carbonate mineral Saturation Indexes for the 47 groundwater samples

## Tables

**Table S1.** Constructive features of monitoring wells. In italic and underscore are indicated MWs not equipped with in-place pumps

| ID        | Depth (m) | Casing | Casing depth (m) | Screen depth (from-to) (m)               |
|-----------|-----------|--------|------------------|------------------------------------------|
| <u>1</u>  | 51.56     | PVC    | 51.56            | 13.7-51.56                               |
| <u>2</u>  | 102       | steel  | 92               | 85.35 -92                                |
| <u>3</u>  | 150       | steel  | 125              | 112.7-125                                |
| <u>4</u>  | 112       | steel  | 112              | 85.7-112                                 |
| <u>5</u>  | 403       | PVC    | 403              | 16.5-403                                 |
| <u>6</u>  | 200       | steel  | 403              | 169.7-175.7; 181.2-200                   |
| <u>7</u>  | n.a.      | n.a.   | n.a.             | n.a.                                     |
| <u>8</u>  | 355       | n.a.   | n.a.             | n.a.                                     |
| <u>9</u>  | 303       | steel  | 300              | 177.87-202.12                            |
| <u>10</u> | 281       | steel  | 281              | 180-200                                  |
| <u>11</u> | 543       | n.a.   | n.a.             | n.a.                                     |
| <u>12</u> | 500.5     | steel  | 350              | 237.5-243.0; 336.1-341.7                 |
| <u>13</u> | 487       | steel  | 410              | 359.3-365.4; 371.6-380; 402.1-408.2      |
| <u>14</u> | 250       | steel  | 205.5            | 185-203                                  |
| <u>15</u> | 200.3     | steel  | 205.5            | 76.8-83; 107.8-114; 126.4-132.6; 138-145 |
| <u>16</u> | 380       | steel  | 380              | 330-380                                  |
| <u>17</u> | 265       | steel  | 265              | 179-265                                  |
| <u>18</u> | 63        | PVC    | 63               | 17-63                                    |
| <u>19</u> | 126.7     | n.a.   | n.a.             | n.a.                                     |
| <u>20</u> | 143.5     | n.a.   | n.a.             | n.a.                                     |
| <u>21</u> | n.a.      | n.a.   | n.a.             | n.a.                                     |
| <u>22</u> | n.a.      | n.a.   | n.a.             | n.a.                                     |
| <u>23</u> | 50        | steel  | 44.6             | 24.7-44.6                                |

|           |       |       |       |               |
|-----------|-------|-------|-------|---------------|
| <u>24</u> | 500.5 | PVC   | 500.5 | 125-500.5     |
| <u>25</u> | 500   | PVC   | 500.5 | 110-500       |
| <u>26</u> | 205   | steel | 196.3 | 179.12-194.78 |
| <u>27</u> | 300   | steel | 200   | 51-177        |
| <u>28</u> | 230   | steel | 200   | 71.34-200     |
| <u>29</u> | 177   | steel | 177   | 51-177        |
| <u>30</u> | 280   | n.a.  | n.a.  | n.a.          |
| <u>31</u> | n.a.  | n.a.  | n.a.  | n.a.          |
| <u>32</u> | n.a.  | n.a.  | n.a.  | n.a.          |
| <u>34</u> | 400   | n.a.  | 300   | 250-300       |
| <u>35</u> | 400   | n.a.  | n.a.  | n.a.          |
| <u>36</u> | 176   | n.a.  | n.a.  | n.a.          |
| <u>37</u> | n.a.  | n.a.  | n.a.  | n.a.          |
| <u>38</u> | n.a.  | n.a.  | n.a.  | n.a.          |
| <u>39</u> | n.a.  | n.a.  | n.a.  | n.a.          |
| <u>40</u> | n.a.  | n.a.  | n.a.  | n.a.          |
| <u>41</u> | 15    | steel | n.a.  | 2.00-15.0     |
| <u>42</u> | 50    | steel | n.a.  | 3.0-50.0      |
| <u>43</u> | n.a.  | PVC   | n.a.  | 45-65         |
| <u>44</u> | n.a.  | n.a.  | n.a.  | n.a.          |
| <u>45</u> | 65    | n.a.  | n.a.  | n.a.          |
| <u>46</u> | n.a.  | n.a.  | n.a.  | n.a.          |
| <u>47</u> | n.a.  | n.a.  | n.a.  | n.a.          |
| <u>48</u> | n.a.  | n.a.  | n.a.  | n.a.          |

**Table S2.** Analytical methods applied for anions, cations, trace elements and dissolved organic carbon analysis and relative detection limits

| Parameters                           | Analytical method                                             | Detection Limits |
|--------------------------------------|---------------------------------------------------------------|------------------|
| Cl <sup>-</sup> (mg/L)               | Ion-Exchange Chromatography                                   | 0.03             |
| Br <sup>-</sup> (mg/L)               | Ion-Exchange Chromatography                                   | 0.02             |
| NO <sub>3</sub> <sup>-</sup> (mg/L)  | Ion-Exchange Chromatography                                   | 0.04             |
| SO <sub>4</sub> <sup>2-</sup> (mg/L) | Ion-Exchange Chromatography                                   | 0.02             |
| NH <sub>4</sub> <sup>+</sup> (mg/L)  | UV/Vis Spectrophotometry                                      | 0.02             |
| Na (mg/L)                            | Inductively Coupled Plasma Mass Spectrometry                  | 0.1              |
| Mg (mg/L)                            | Inductively Coupled Plasma Mass Spectrometry                  | 0.1              |
| K (mg/L)                             | Inductively Coupled Plasma Mass Spectrometry                  | 0.1              |
| Ca (mg/L)                            | Inductively Coupled Plasma Mass Spectrometry                  | 0.1              |
| Li (µg/L)                            | Inductively Coupled Plasma Mass Spectrometry                  | 0.1              |
| B (µg/L)                             | Inductively Coupled Plasma Mass Spectrometry                  | 0.5              |
| Rb (µg/L)                            | Inductively Coupled Plasma Mass Spectrometry                  | 0.2              |
| Sr (µg/L)                            | Inductively Coupled Plasma Mass Spectrometry                  | 0.2              |
| DOC (mg/L)                           | Combustion Catalytic Oxidation/Non Dispersive Infrared (NDIR) | 0.004            |

**Table S3.** In the table are indicated the main statistics of measured parameters discussed in the paper

**Min            Max            Mean            Median            St. Dev.**

|                                      |       |        |        |       |        |
|--------------------------------------|-------|--------|--------|-------|--------|
| T (°C)                               | 16.8  | 25.4   | 18.7   | 18.2  | 1.8    |
| pH                                   | 6.6   | 7.3    | 7.0    | 6.9   | 0.2    |
| EC (µS/cm)                           | 711   | 19590  | 3400   | 1740  | 4452   |
| DO (mg/L)                            | 0.1   | 9.7    | 5.3    | 5.2   | 2.4    |
| ORP (mV)                             | -97   | 161    | 88     | 99    | 47     |
| NH <sub>4</sub> <sup>+</sup> (mg/L)  | <0.02 | 1.1    | 0.1    | 0.03  | 0.2    |
| Cl <sup>-</sup> (mg/L)               | 39.1  | 9684.1 | 1114.9 | 388.5 | 1984.2 |
| Br <sup>-</sup> (mg/L)               | 0.2   | 33.0   | 4.0    | 1.5   | 6.7    |
| NO <sub>3</sub> <sup>-</sup> (mg/L)  | 15.5  | 126.6  | 39.9   | 31.5  | 25.0   |
| SO <sub>4</sub> <sup>2-</sup> (mg/L) | 13.0  | 1225.3 | 149.6  | 56.0  | 247.1  |
| HCO <sub>3</sub> <sup>-</sup> (mg/L) | 296.8 | 1039.1 | 446.2  | 432.4 | 105.6  |
| Na (mg/L)                            | 24.1  | 4927.0 | 594.2  | 203.4 | 1046.4 |
| K (mg/L)                             | 1.7   | 198.7  | 26.8   | 9.9   | 44.8   |
| Mg (mg/L)                            | 10.4  | 661.3  | 98.2   | 59.4  | 124.9  |
| Ca (mg/L)                            | 80.4  | 317.1  | 134.3  | 119.7 | 50.6   |
| Li (µg/L)                            | 0.8   | 126.7  | 19.8   | 9.9   | 26.6   |
| B (µg/L)                             | 34.3  | 2309.0 | 291.3  | 154.4 | 429.5  |
| Rb (µg/L)                            | 1.1   | 57.4   | 8.3    | 4.2   | 11.4   |
| Sr (µg/L)                            | 137.0 | 3825.0 | 936.6  | 676.0 | 830.9  |
| DOC (mg/L)                           | 0.4   | 11.0   | 1.0    | 0.6   | 1.5    |

**Table S4.** In the table are indicated MWs, chloride concentration, the groundwater (GW) group based on chloride concentration, mixing percentage ( $f_{\text{sea}}\%$ ), the Na/Cl, Cl/HCO<sub>3</sub> and Ca/HCO<sub>3</sub> ratios and the cluster groups. In italic and underscore are indicated MWs not equipped with in-place pumps. The limits of GW groups are: 1) Cl<sup>-</sup> < 250 mg/L; 2) 250 ≤ Cl<sup>-</sup> < 700 mg/L; 3) 700 mg/L ≤ Cl<sup>-</sup> < 3000 mg/L; 4) Cl<sup>-</sup> ≥ 3000 mg/L. Na/Cl < 0.90 indicates MWs affected by SWI. Cl/HCO<sub>3</sub> < 0.5 indicates MWs no affected by SWI; 0.5 < Cl/HCO<sub>3</sub> < 1.3 indicates MWs slightly affected by SWI; 1.3 < Cl/HCO<sub>3</sub> < 2.8 indicates MWs moderately affected by SWI; 2.8 < Cl/HCO<sub>3</sub> < 6.6 indicates MWs injuriously affected by SWI and Cl/HCO<sub>3</sub> > 6.6 indicates MWs highly affected by SWI. Ca/HCO<sub>3</sub> around 1 is typical of carbonate dissolution, around 0.5 is typical of dolomite dissolution and >1 can be attributed to mixing with seawater and possible reverse ion exchange processes.

| ID       | Cl <sup>-</sup><br>(mg/L) | GW<br>Group | $f_{\text{sea}}\%$ | Na/Cl | Cl/HCO <sub>3</sub> | Ca/HCO <sub>3</sub> | Cluster Group |
|----------|---------------------------|-------------|--------------------|-------|---------------------|---------------------|---------------|
| <u>1</u> | 813                       | 3           | 4.1                | 0.93  | 2.8                 | 0.6                 | Cluster D     |
| <u>2</u> | 751                       | 3           | 3.8                | 0.90  | 2.6                 | 0.9                 | Cluster D     |
| <u>3</u> | 1238                      | 3           | 6.4                | 0.84  | 5.2                 | 1.0                 | Cluster D     |
| <u>4</u> | 721                       | 3           | 3.6                | 0.82  | 3.0                 | 1.0                 | Cluster D     |

|           |      |   |      |      |      |     |                                      |
|-----------|------|---|------|------|------|-----|--------------------------------------|
| <u>5</u>  | 581  | 2 | 2.9  | 0.71 | 3.4  | 1.3 | Cluster D                            |
| 6         | 173  | 1 | 0.8  | 0.77 | 0.6  | 0.7 | Cluster A                            |
| 7         | 164  | 1 | 0.7  | 0.70 | 0.6  | 0.7 | Cluster A                            |
| 8         | 73   | 1 | 0.3  | 0.85 | 0.3  | 0.7 | Cluster A                            |
| 9         | 376  | 2 | 1.8  | 0.82 | 1.5  | 0.7 | Cluster C                            |
| 10        | 120  | 1 | 0.5  | 0.73 | 0.5  | 0.6 | Cluster A                            |
| 11        | 113  | 1 | 0.5  | 0.92 | 0.4  | 0.8 | Cluster A                            |
| 12        | 45   | 1 | 0.1  | 1.12 | 0.2  | 1.0 | Cluster A                            |
| 13        | 64   | 1 | 0.2  | 0.95 | 0.2  | 0.7 | Cluster A                            |
| 14        | 549  | 2 | 2.7  | 0.77 | 2.1  | 0.8 | Cluster C                            |
| 15        | 105  | 1 | 0.4  | 0.77 | 0.4  | 0.7 | Cluster A                            |
| 16        | 573  | 2 | 2.9  | 0.81 | 2.1  | 0.6 | Cluster C                            |
| 17        | 376  | 2 | 1.8  | 0.83 | 1.8  | 0.9 | Cluster C                            |
| 18        | 191  | 1 | 0.9  | 0.74 | 0.7  | 0.6 | Cluster A                            |
| 19        | 158  | 1 | 0.7  | 0.82 | 0.6  | 0.7 | Cluster A                            |
| 20        | 289  | 2 | 1.4  | 0.74 | 1.1  | 0.7 | Cluster B                            |
| 21        | 659  | 2 | 3.3  | 0.90 | 3.2  | 0.9 | Cluster D                            |
| 22        | 95   | 1 | 0.4  | 0.94 | 0.4  | 0.8 | Cluster A                            |
| 23        | 941  | 3 | 4.8  | 0.83 | 4.5  | 1.1 | Cluster D                            |
| <u>24</u> | 1059 | 3 | 5.4  | 0.89 | 4.6  | 0.8 | Cluster D                            |
| <u>25</u> | 9684 | 4 | 50.6 | 0.78 | 42.9 | 2.3 | Cluster E                            |
| 26        | 514  | 2 | 2.6  | 0.78 | 2.0  | 0.9 | Cluster C                            |
| 27        | 133  | 1 | 0.6  | 0.87 | 0.4  | 0.6 | Cluster A                            |
| 28        | 176  | 1 | 0.8  | 1.00 | 0.6  | 0.6 | Cluster A                            |
| <u>29</u> | 7196 | 4 | 37.6 | 0.83 | 26.1 | 2.0 | Cluster E                            |
| 30        | 457  | 2 | 2.3  | 0.75 | 1.9  | 0.8 | Cluster C                            |
| 31        | 1657 | 3 | 8.6  | 0.76 | 8.7  | 1.7 | Cluster E                            |
| 32        | 498  | 2 | 2.5  | 0.79 | 0.8  | 0.3 | not included in the cluster analysis |
| 34        | 233  | 1 | 1.1  | 0.58 | 0.9  | 1.0 | Cluster B                            |
| 35        | 64   | 1 | 0.2  | 1.03 | 0.2  | 0.6 | Cluster A                            |
| 36        | 298  | 2 | 1.4  | 0.86 | 1.2  | 0.7 | Cluster C                            |

|    |      |   |      |      |      |     |           |
|----|------|---|------|------|------|-----|-----------|
| 37 | 5227 | 4 | 27.3 | 0.87 | 23.5 | 1.7 | Cluster E |
| 38 | 39   | 1 | 0.1  | 0.95 | 0.2  | 0.9 | Cluster A |
| 39 | 1199 | 3 | 6.2  | 0.87 | 4.4  | 0.8 | Cluster D |
| 40 | 857  | 3 | 4.4  | 0.74 | 3.4  | 1.7 | Cluster D |
| 41 | 4523 | 4 | 23.6 | 0.82 | 20.3 | 1.6 | Cluster E |
| 42 | 4735 | 4 | 24.7 | 0.81 | 20.1 | 1.6 | Cluster E |
| 43 | 389  | 2 | 1.9  | 0.81 | 1.4  | 0.7 | Cluster C |
| 44 | 61   | 1 | 0.2  | 0.85 | 0.3  | 0.8 | Cluster A |
| 45 | 3162 | 4 | 16.4 | 0.85 | 13.2 | 1.3 | Cluster E |
| 46 | 357  | 2 | 1.7  | 0.82 | 1.7  | 1.1 | Cluster C |
| 47 | 638  | 2 | 3.2  | 0.85 | 2.9  | 1.0 | Cluster D |
| 48 | 74   | 1 | 0.3  | 1.01 | 0.3  | 0.9 | Cluster A |
